# Supplementary material for: Active heat pulse sensing of 3-D-flow fields in streambeds
Source: Copernicus journal article supplement (doi:10.5194/hess-22-1917-2018), 2018-03-20
Supplement: Supplementary file [file hess-22-1917-2018-supplement-title-page.pdf › hess-22-1917-2018-supplement-title-page.pdf]

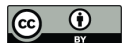

## *Supplement of*

# **Active heat pulse sensing of 3-D-flow fields in streambeds**

**Eddie W. Banks et al.**

*Correspondence to:* Eddie W. Banks ([eddie.banks@flinders.edu.au](mailto:eddie.banks@flinders.edu.au))

- [hess-22-1917-2018-supplement-title-page.pdf](#)
- [Banks\\_et al\\_2017\\_HotRod\\_Supporting Information\\_HESS.pdf](#)

The copyright of individual parts of the supplement might differ from the CC BY 4.0 License.
